# Supplementary material for: The ASH1-miR-375-YWHAZ Signaling Axis Regulates Tumor Properties in Hepatocellular Carcinoma
Source: PubMed Central journal article supplement — Mol Ther Nucleic Acids. 2018 Apr 25;11:538–53. doi: 10.1016/j.omtn.2018.04.007 (PMC5944419; doi:10.1016/j.omtn.2018.04.007), 2018-04-25
Supplement: mmc1.pdf [file mmc1.pdf]

**OMTN, Volume 11**

**Supplemental Information**

**The ASH1-miR-375-YWHAZ Signaling Axis  
Regulates Tumor Properties in Hepatocellular  
Carcinoma**

**Juan-Feng Zhao, Qiu Zhao, Hui Hu, Jia-Zhi Liao, Ju-Sheng Lin, Chao Xia, Ying Chang, Jing Liu, An-Yuan Guo, and Xing-Xing He**

## Supporting Figures

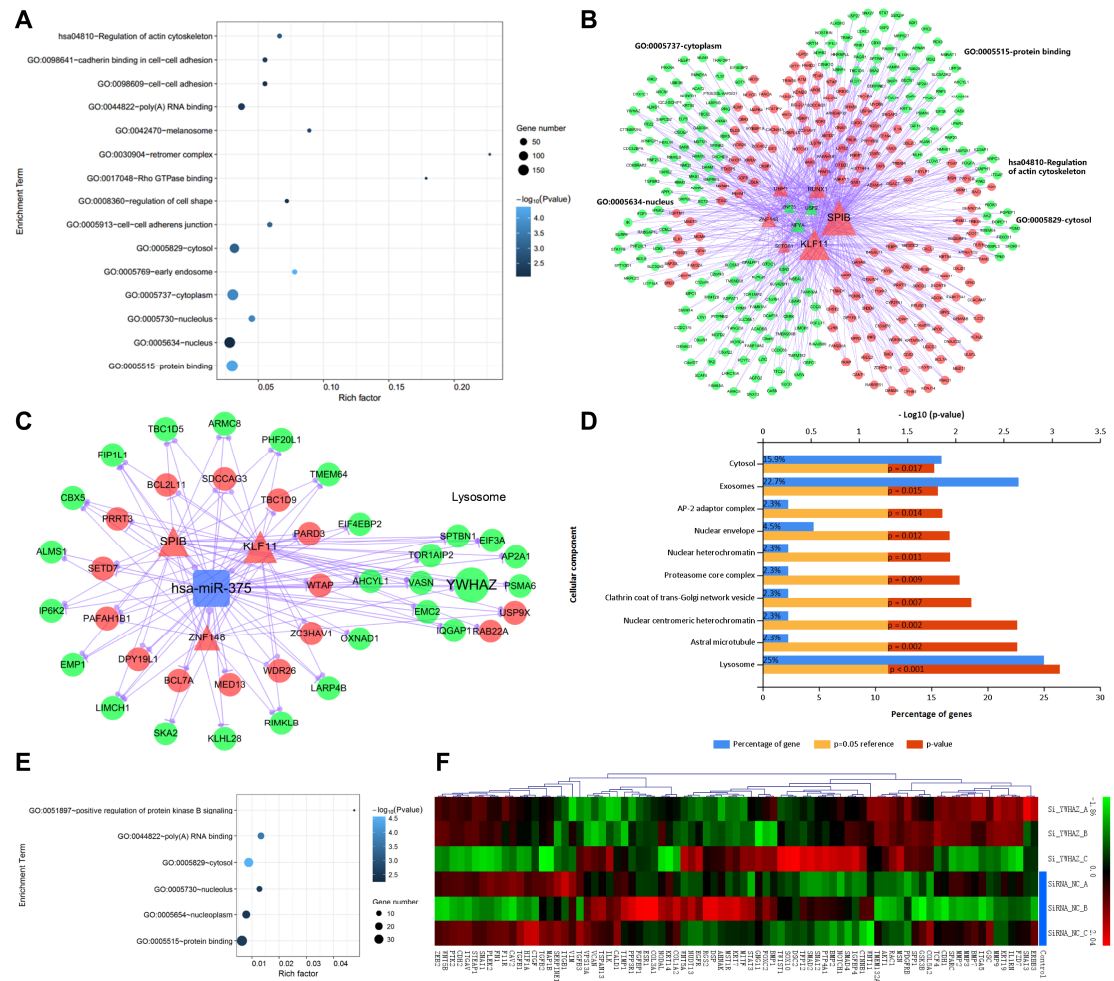

**Figure S1** Gene enrichment analysis and network construction about differentially expressed genes. (A) Enrichment Analysis of 553 Differentially Expressed Genes. The vertical axis represents the name of the enriched term, the abscissa is Rich factor (the ratio of the number of genes enriched to the total number of genes contained in the term), and the right graph indicates the number of genes on the term and  $-\log_{10}$  (PValue). (B) Regulatory network of si-YWHAZ DEGs. Triangles: TFs; circles: target genes; rounded rectangles: miRNAs. The node size indicates the connectivity (the total number of edges) of the node. Node color: Red represents up-regulation in siYWHAZ samples, green is down-regulation. The large network is categorized and displayed according to enriched terms. (C) A small regulatory network which miR-375 as a core node target to DEGs in figure (B). (D) Enrichment analysis of 44

genes in figure (C). (E) Enrichment Analysis of 78 co-expression genes of YWHAZ in TCGA HCC samples. (F) Heat map of 81 EMT genes in siYWHAZ microarray data.

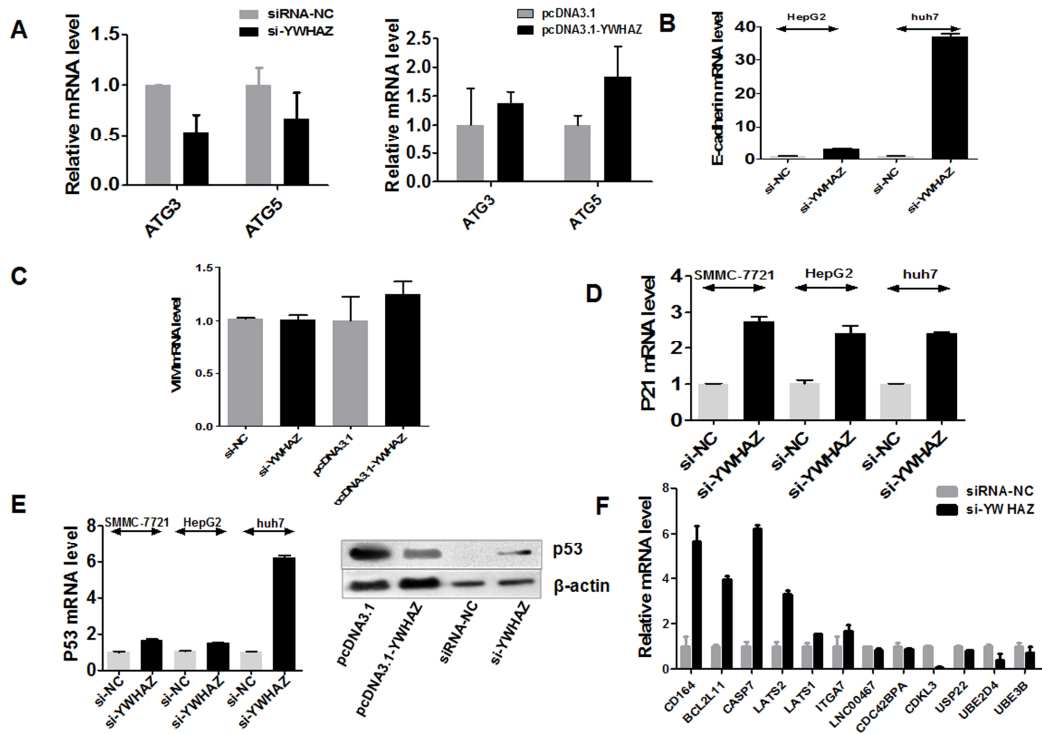

**Figure S2** YWHAZ regulates autophagy/EMT and P53-P21 pathway. (A) The expression of ATG3 and ATG5 mRNA was examined by SYBR Green qRT-PCR in SMMC-7721 cell lines transfected with si-YWHAZ, pcDNA3.1-YWHAZ or their relative negative controls. (B) E-cadherin mRNA was examined by SYBR Green qRT-PCR in HepG2 and huh7 cell lines transfected with si-YWHAZ or si-NC. (C) Relative mRNA expression of VIM was detected by SYBR Green qRT-PCR in SMMC-7721 cell lines after transfected with si-NC, si-YWHAZ, pcDNA3.1 or pcDNA3.1-YWHAZ. (D) SYBR Green qRT-PCR was used to detect the expression of P21 in three hepatoma cell lines transfected with si-YWHAZ or si-NC. (E) Left: SYBR Green qRT-PCR was used to detect the expression of P53 in three hepatoma cell lines transfected with si-YWHAZ or si-NC. Right: The expression of p53 protein was detected by Western blot in SMMC-7721 cell lines after transfected with

pcDNA3.1-YWHAZ, si-YWHAZ or their relative negative controls. (F) The expression of some other YWHAZ downstream genes was detected by SYBR Green qRT-PCR in SMMC-7721 cell lines after transfected with si-YWHAZ or si-NC.

## Supporting Tables

**Table S1. Sequences of siRNA**

| <b>siRNA</b>      | <b>Target sequence</b> |
|-------------------|------------------------|
| <b>si-YWHAZ-1</b> | GCTCGAGAATACAGAGAGA    |
| <b>si-YWHAZ-2</b> | CGCTGGTGATGACAAGAAA    |
| <b>si-YWHAZ-3</b> | GTGAAGAGTCATACAAAGA    |
| <b>si-ASH1-1</b>  | CCAACGACTTGA ACTCCAT   |
| <b>si-ASH1-2</b>  | CCAACAAGAAGATGAGTAA    |
| <b>si-ASH1-3</b>  | GCGTCAAGTTGGTCAACCT    |

**Table S2. Primer sequences used in SYBR Green qRT-PCR.**

| <b>Gene Name</b> | <b>Forward primer</b>  | <b>Reverse primer</b>   |
|------------------|------------------------|-------------------------|
| YWHAZ            | TGATCCCCAATGCTTCACAAG  | GCCAAGTAACGGTAGTAATCTCC |
| ASH1             | CCCAAGCAAGTCAAGCGACA   | AAGCCGCTGAAGTTGAGCC     |
| P53              | ACAGCTTTGAGGTGCGTGTTT  | CCCTTTCTTGCGGAGATTCTCT  |
| P21              | TGTCCGTCAGAACCCATGC    | AAAGTCGAAGTTCCATCGCTC   |
| E-cadherin       | AAAGGCCCATTTCTAAAAACCT | TGCGTTCTCTATCCAGAGGCT   |
| VIM              | AAATGGCTCGTCACCTTCG    | TGAGTGGGTATCAACCAGAGG   |
| USP22            | GTGTCTTCTTCGGCTGTTT    | CCTCCTTGGCGATTATTT      |
| UBE2D4           | AGCCTTGCTCTGTCTCC      | AACACCGTCTCCACTAAA      |
| UBE3B            | CGCTGTCTTACGACGAGG     | TGGAACGGAATCCGCTAA      |
| LATS2            | GGCGATTCGTTTGCGTCCTA   | TTGGGTGGGTGCTGGTGCTG    |
| LATS1            | TGGGACAACCTCCTTTCT     | AGCACCATTCTTGCCTAA      |
| CDKL3            | TATGAAGGTGGACTTGGTC    | GTTAGATTGATGGGTGGC      |
| BCL2L11          | ACAGAGCCACAAGACAGGAGC  | GCCATACAAATCTAAGCCAGTAA |
| CASP7            | TTTGACAGCCCACTTTAGG    | GGATCTTGTATCGAGGATTAG   |
| CDC42BPA         | CAGTCTTGGCTTCTGATGT    | ACTCCCACCCACTTATTCT     |
| CD164            | GGTTGACTGAGCGTTGCG     | GCCGAGGTTACGTTGGAGA     |
| ITGA7            | ACCCTGGGCTCTGCCTTCT    | CGCCGCCTCCTATCCCTACT    |
| LINC00467        | GAAGCCAGACAGATTCAAGTA  | AGCCCAGTTTCAGTCCCT      |
| ATG3             | AGACTCCACGATTATGGTTGT  | CTGCATGGGTGAACTGAAC     |
| ATG5             | AAAGAATAGCCAGTACAGCA   | AATGAACCGACGAATAAAC     |
| ATG7             | GGTCAAAGGACGAAGATAACA  | TACGGTCACGGAAGCAAA      |
| $\beta$ -actin   | CATGTACGTTGCTATCCAGGC  | CTCCTTAATGTCACGCACGAT   |

**Table S3. The sequences of 55-mer double-stranded oligonucleotides containing the predicted miRNA binding sites.**

| Targeted Gene        | sequence                                                                                                                                                |
|----------------------|---------------------------------------------------------------------------------------------------------------------------------------------------------|
| <b>YWHAZ</b>         | FS:5'-CTAGTGCATCTTGGAGGGTCGTCTCAAGTATT <b>GAACAAA</b> AAGACGGAAGGTGCTA-3'<br>RS:5'-AGCTTAGCACCTTCCGTCTTT <b>TGTTCA</b> AATACTTGAGACGACCCTCCAAGATGACA-3' |
| <b>Mutated YWHAZ</b> | FS:5'-CTAGTGCATCTTGGAGGGTCGTCTCAAGTATTT <b>GTATCG</b> AGACGGAAGGTGCTA-3'<br>RS:5'-AGCTTAGCACCTTCCGTCT <b>CGATACA</b> AATACTTGAGACGACCCTCCAAGATGACA-3'   |

The sequences highlighted by italic bold type refer to predicted pairing nucleotide with the seeding sequences of corresponding miRNAs. Italic letters refer to overhangs of restriction enzyme sites. FS, forward sequence; RS, reverse sequence.

**Table S4. Enrichment analysis of the co-expression genes of YWHAZ in TCGA hepatocellular carcinoma (HCC) samples.**

| Term                                                                      | Count | PValue   | Co-expression genes of YWHAZ in TCGA HCC samples                                                                                                                                                                                                                            |
|---------------------------------------------------------------------------|-------|----------|-----------------------------------------------------------------------------------------------------------------------------------------------------------------------------------------------------------------------------------------------------------------------------|
| GO:0005829~<br>cytosol                                                    | 30    | 2.99E-05 | NBN, CHMP4C, POLR2K, KIAA0196, ASAP1, AZIN1, MAF1, ARFGEF1, ARHGAP39, WDYHV1, MTHFD1L, PTK2, RAD21, RPL7, HSF1, EIF3H, AGO2, PABPC1, NSMAF, SUOX, RAN, CCT6A, STK3, VASP, ANXA2, ATP6V1C1, CCT5, RCC2, RIPK2, TCEB1                                                         |
| GO:0044822~<br>poly(A) RNA<br>binding                                     | 15    | 2.27E-04 | UTP23, MTDH, RAN, STIP1, CCT6A, ANXA2, DCAF13, MRPL13, RPL7, RCC2, EIF3H, POP1, AGO2, PABPC1, KIAA1429                                                                                                                                                                      |
| GO:0005730~<br>nucleolus                                                  | 11    | 2.52E-03 | UTP23, DCAF13, NBN, CCT5, MTDH, RCC2, E2F5, RPL7, RAN, MAF1, ARFGEF1                                                                                                                                                                                                        |
| GO:0005515~<br>protein<br>binding                                         | 39    | 2.56E-03 | NBN, MTDH, E2F5, CHMP4C, MAL2, KIAA0196, ASAP1, TPD52, ARFGEF1, SCRIB, WDYHV1, INTS8, PTK2, MRPL13, RAD21, HSF1, RPL7, EIF3H, AGO2, PABPC1, NSMAF, TRAM1, UTP23, RAN, CCT6A, TATDN1, C8ORF33, VASP, STK3, ANXA2, CHRAC1, CCT5, MED30, RCC2, UBR5, RIPK2, TCEB1, EMC2, DSCC1 |
| GO:0005654~<br>nucleoplasm                                                | 22    | 2.91E-03 | NBN, E2F5, POLR2K, RAN, MAF1, TATDN1, ARFGEF1, SCRIB, INTS8, DCAF13, RAD21, MED30, DCAF11, HSF1, IVD, UBR5, POP1, AGO2, TCEB1, NFIA, DSCC1, KIAA1429                                                                                                                        |
| GO:0051897~<br>positive<br>regulation of<br>protein kinase<br>B signaling | 4     | 5.20E-03 | PTK2, MTDH, ARFGEF1, STK3                                                                                                                                                                                                                                                   |
